# Supplementary material
Source: Springer Nature journal article supplement (http://www.springermedizin.de/resource/supplementary/13063_2008_250_MOESM3_ESM.pdf/9622384)
Supplement: MOESM3 [file 9622384]

Multi-Centre Research Ethics  
Committee for Scotland

Secretariat  
Deaconess House  
148 Pleasance  
Edinburgh  
EH8 9RS  
Telephone 0131 536 9067  
Fax 0131 536 9346  
[www.corec.org.uk](http://www.corec.org.uk)

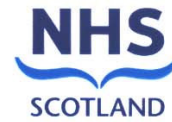

Dr Richard Lindley  
Dept of Clinical Neurosciences  
Bramwell Dott Building  
Western General Hospital  
Edinburgh EH4 2XU

Date: 4<sup>th</sup> November 2003  
Your Ref.:  
Our Ref.: MREC/99/0/78

Enquiries to: Dorothy Garrow  
Direct Line: 0131 536 9067  
Email: [dorothy.garrow@lhb.scot.nhs.uk](mailto:dorothy.garrow@lhb.scot.nhs.uk)

Dear Dr Lindley

**MREC/99/0/78: Third International Stroke Trial: Thrombolysis for acute ischaemic stroke.**

Thank you for your recent letter enclosing an amendment to the above study. The Amendments Sub-Committee of the Multi-Centre Research Ethics Committee for Scotland has reviewed the documents outlined below:

Final Approved Papers:  
Covering letter dated 27<sup>th</sup> October 2003  
Amendment Approval Request form  
Protocol Version 1.9 dated 27<sup>th</sup> October  
Report of the Data Monitoring Committee.  
Randomisation Notepad  
Patient treatment and Monitoring Record  
6 month follow up Questionnaire  
18<sup>th</sup> month follow up Questionnaire

The Sub-Committee has agreed the amendment.

This letter, together with details of the amendment submitted to the Amendments Sub-Committee, should be sent to the LRECs involved in the review of the study for information only.

Chairman Professor Kennedy Lees  
Vice-Chairman Dr Geroge Masterton

Yours sincerely

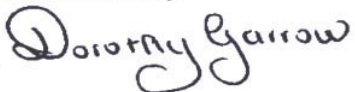

**DOROTHY GARROW**

**MREC Administrative Officer**

*cc: Mrs Tricia Cracknell*

*Stroke Association*

*Whitecross Street*

*London*

*EC1Y 8JJ*

*Cc: Professor Peter Sandercock*

*Principal Investigator*

*Division of Clinical Neurosciences*

*University of Edinburgh*

*Bramwell Dott Building*

*Western General Hospital*

*Crewe Road*

*Edinburgh*
